# Supplementary material for: Magnetite-functionalized eggshell membrane composite: a high-performance magnetic adsorbent for Congo red dye
Source: Royal Society of Chemistry journal article supplement (doi:10.1039/d6ra01484d), 2026-05-14
Supplement: d6ra01484d1.pdf [file d6ra01484d1.pdf]

## **Magnetite-Functionalized Eggshell Membrane Composite: A High-Performance Magnetic Adsorbent for Congo Red Dye**

Faheem Shah,<sup>a\*</sup>

*<sup>a</sup> Department of Chemistry, College of Science, King Faisal University, Hofuf, Eastern Province  
AlAhsa-31982, Kingdom of Saudi Arabia*

**[Supplementary Information](#)**

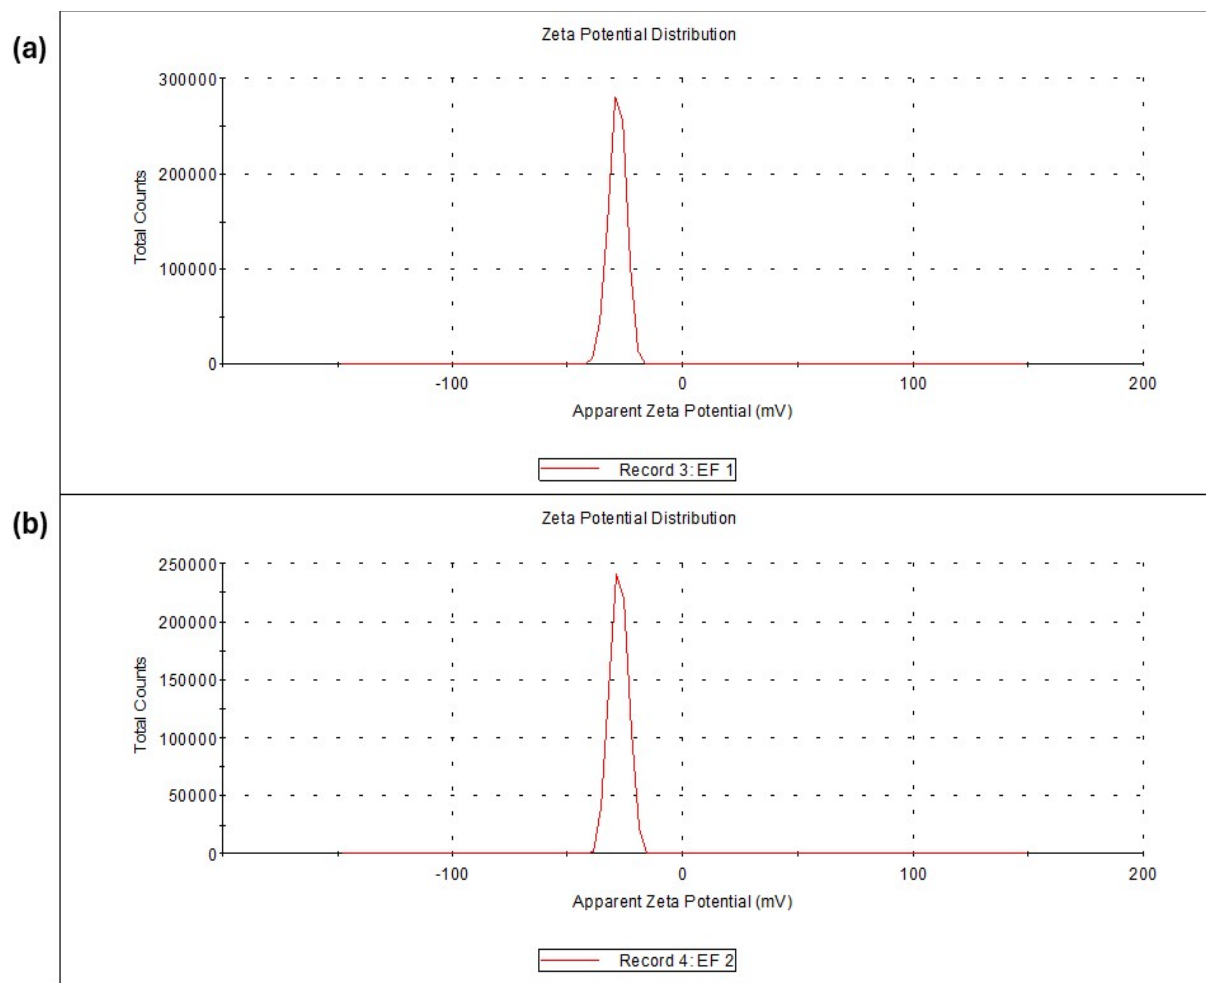

**Figure S1.** Zeta potential of (a) Fe<sub>3</sub>O<sub>4</sub> nanoparticles and (b) Fe<sub>3</sub>O<sub>4</sub>@ESM

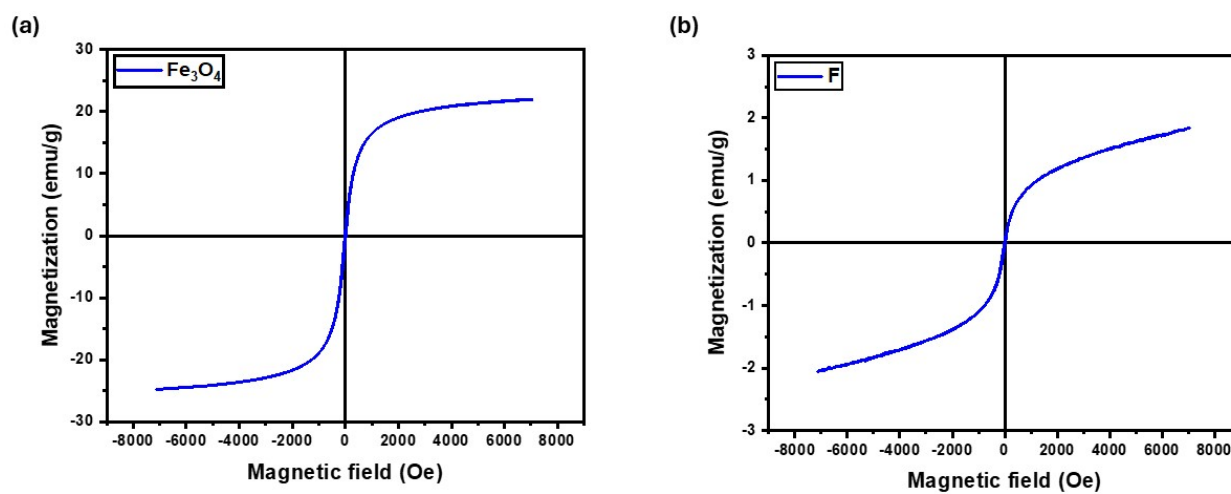

**Figure S2.** Magnetization curve of (a) Fe<sub>3</sub>O<sub>4</sub> nanoparticles and (b) Fe<sub>3</sub>O<sub>4</sub>@ESM

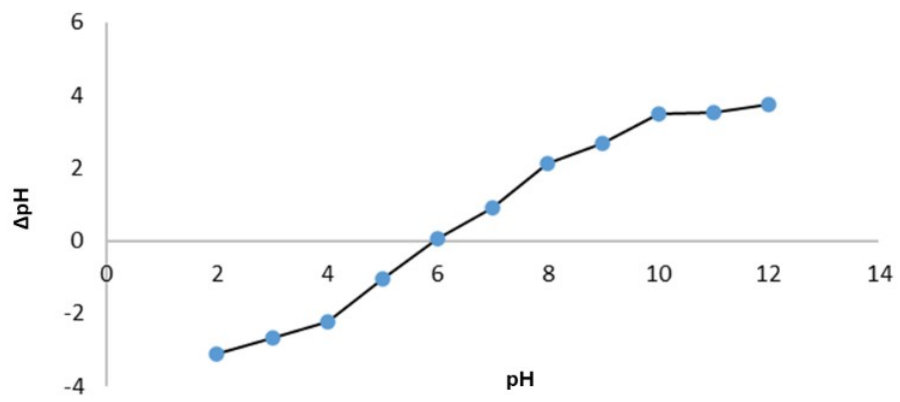

**Figure S3.** pHpzc of Fe<sub>3</sub>O<sub>4</sub>@ESM.

(a)

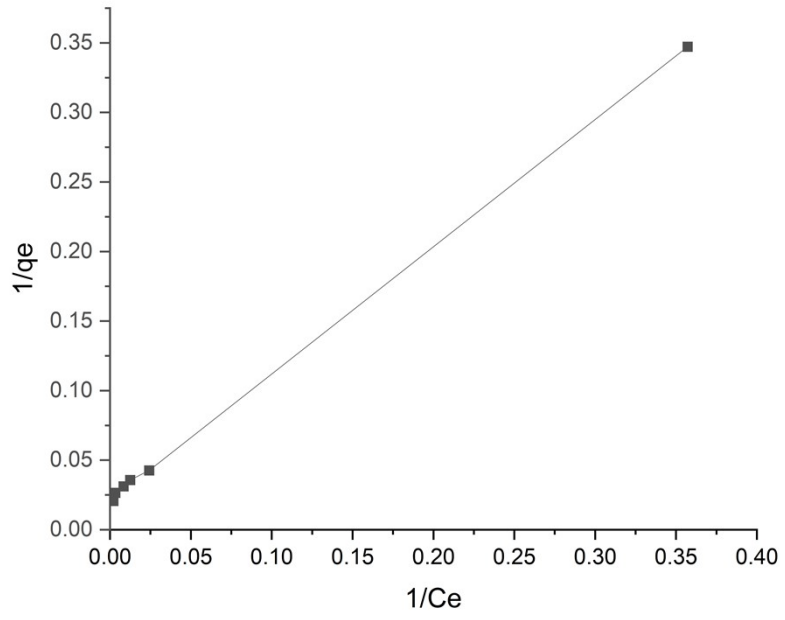

(b)

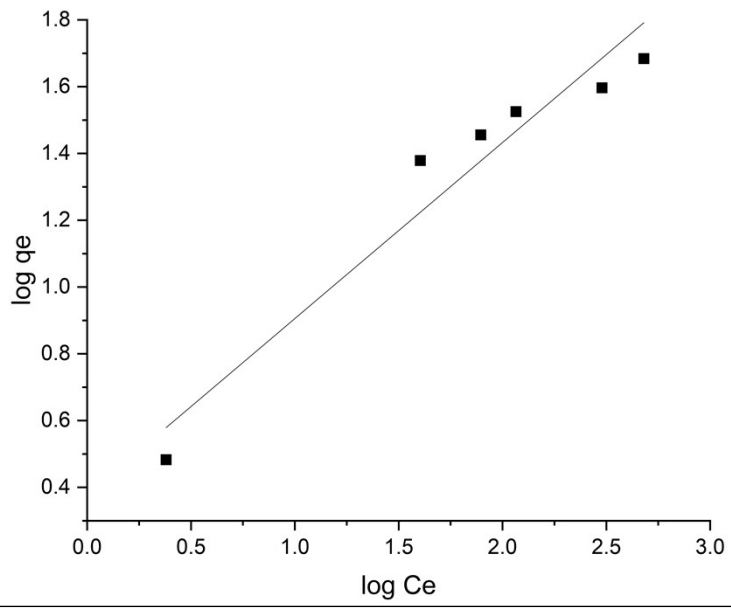

(c)

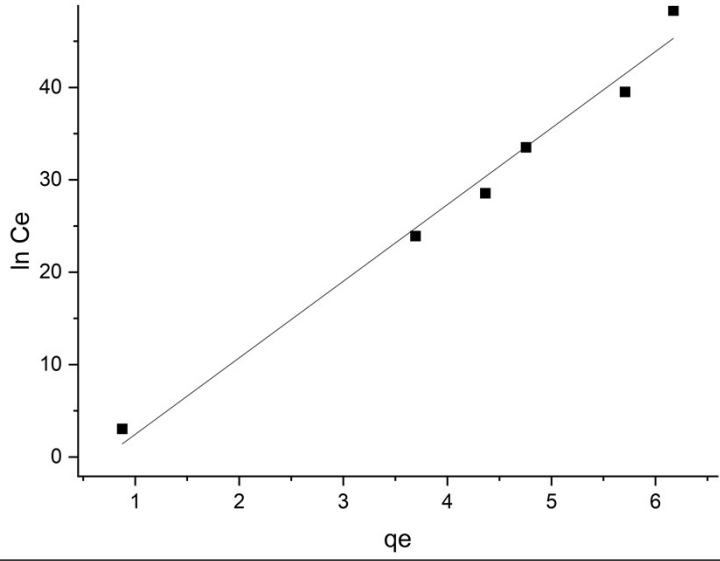

(d)

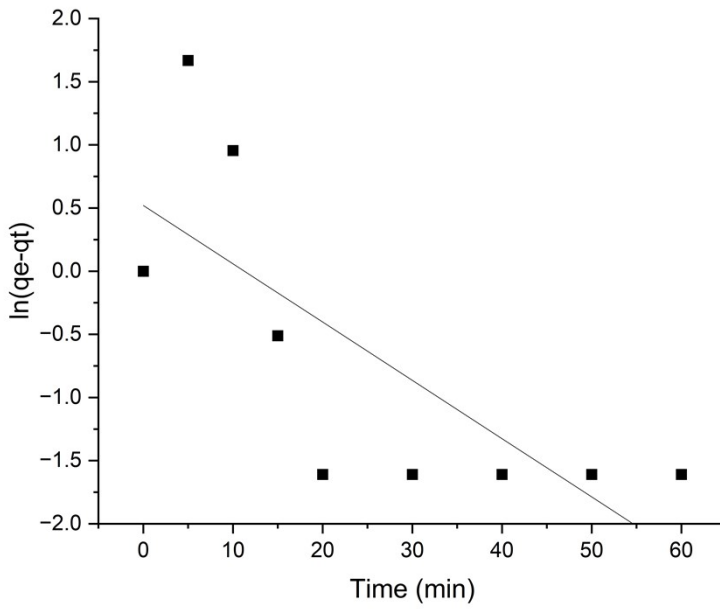

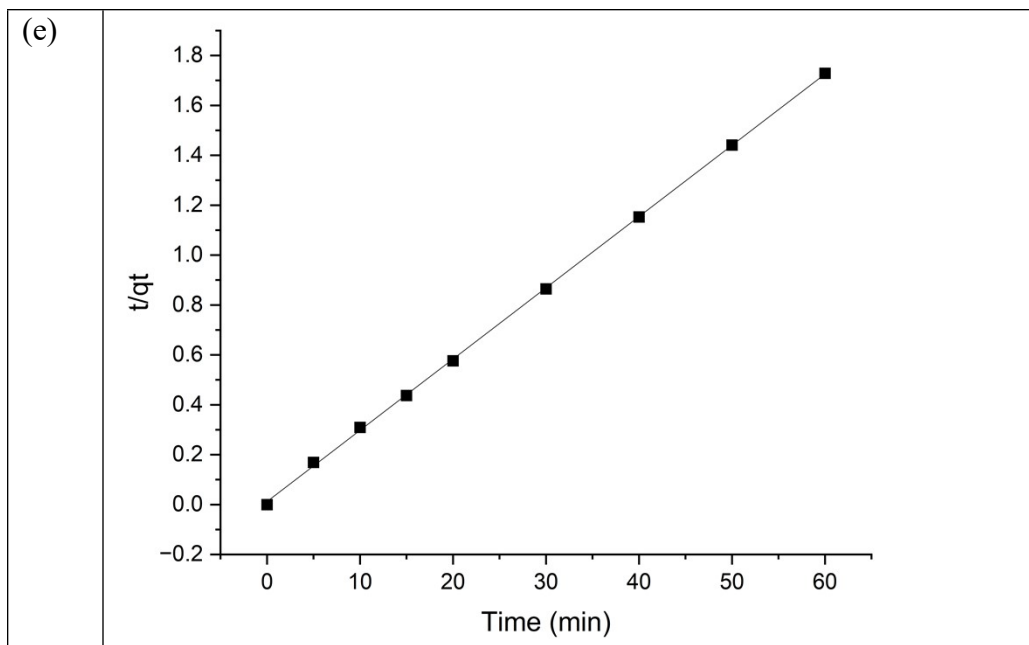

**Figure S4.** a) Langmuir isotherm, b) Freundlich isotherm, c) Temkin isotherm, d) Pseudo-first-order kinetics, and e) Pseudo-second-order kinetics for CR adsorption onto  $\text{Fe}_3\text{O}_4@\text{ESM}$ .

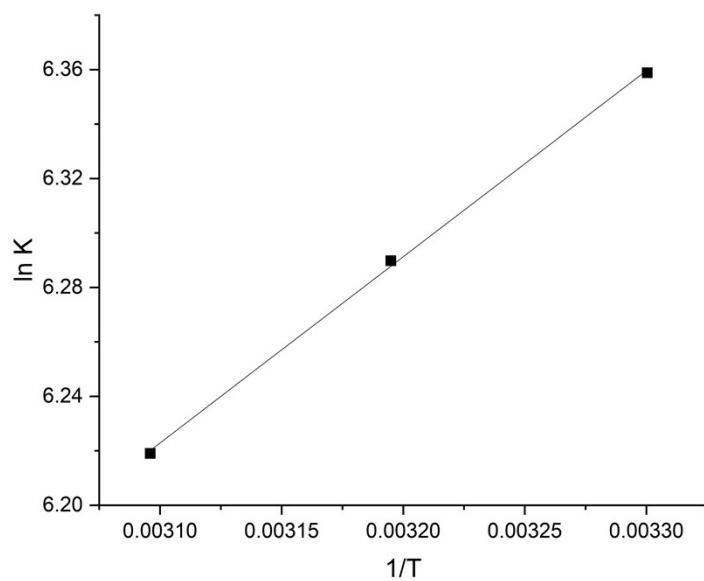

**Figure S5.** Van't Hoff plot for the adsorption of Congo Red onto  $\text{Fe}_3\text{O}_4@\text{ESM}$  (plot of  $\ln(K)$  versus  $1/T$ ).

**Table S6.** Validation of SPE through standard addition method in real sample.

| Added (mg) | Wastewater  |            |
|------------|-------------|------------|
|            | Found (mg)  | % Recovery |
| 0          | 29.5 ± 4.0  | -          |
| 125        | 152.9 ± 9.1 | 98.7       |
| 250        | 274.3 ± 6.6 | 97.9       |
| 500        | 509.8 ± 9.8 | 96.1       |

\*Mean ± S.D
